# Supplementary material
Source: PubMed Central journal article supplement (PMC5913955)
Supplement: AAC.02035-17_zac004187026s1.pdf [file AAC.02035-17_zac004187026s1.pdf]

## Supplemental Material

### Supplemental figure

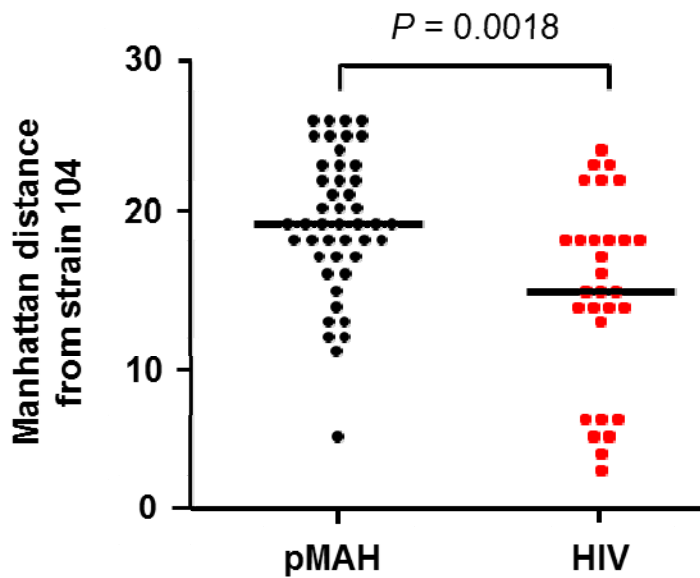

**FIG S1** Genetic distances of MAH isolates from different hosts. The genetic distance was calculated as the Manhattan distance of MAH isolates from the reference strain 104. The results are shown for MAH isolates from pulmonary MAH disease patients and HIV-positive patients. Horizontal lines indicate the mean value of genetic distance for the group; *p* values were calculated using a Mann–Whitney U test.

Supplemental Tables

**TABLE S1** MIC distributions of test drugs for 46 isolates from pulmonary MAH disease patients

| Antimicrobial agent | MIC ( $\mu\text{g/mL}$ ) |      |      |       |      |     |    |    |    |    |    |    |      |
|---------------------|--------------------------|------|------|-------|------|-----|----|----|----|----|----|----|------|
|                     | < 0.03                   | 0.03 | 0.06 | 0.125 | 0.25 | 0.5 | 1  | 2  | 4  | 8  | 16 | 32 | > 32 |
| Clarithromycin      |                          |      | 1    |       | 15   | 13  | 14 | 1  |    | 1  |    |    | 1    |
| Rifampicin          | 8                        |      | 10   | 6     | 7    | 2   | 6  | 4  | 2  |    |    |    | 1    |
| Ethambutol          |                          |      |      |       |      |     |    | 1  | 6  | 20 | 17 | 1  | 1    |
| Streptomycin        |                          |      |      |       |      |     | 5  | 11 | 16 | 10 | 4  |    |      |
| Kanamycin           |                          |      |      |       |      |     | 1  | 4  | 10 | 16 | 12 | 3  |      |
| Amikacin            |                          |      |      |       |      |     | 2  | 9  | 14 | 14 | 7  |    |      |
| Ethionamide         |                          |      |      |       |      |     |    | 2  | 14 | 23 | 7  |    |      |
| Levofloxacin        |                          |      |      |       | 1    | 6   | 11 | 19 | 9  |    |    |    |      |

**TABLE S2** MIC distributions of test drugs for 30 isolates from HIV-positive patients

| Antimicrobial agent | MIC ( $\mu\text{g/mL}$ ) |      |      |       |      |     |   |   |    |   |    |    |      |
|---------------------|--------------------------|------|------|-------|------|-----|---|---|----|---|----|----|------|
|                     | < 0.03                   | 0.03 | 0.06 | 0.125 | 0.25 | 0.5 | 1 | 2 | 4  | 8 | 16 | 32 | > 32 |
| Clarithromycin      | 3                        |      | 5    | 6     | 4    | 6   | 3 |   |    |   |    |    | 3    |
| Rifampicin          | 5                        |      | 7    | 4     | 6    | 2   | 3 | 3 |    |   |    |    |      |
| Ethambutol          |                          |      |      |       |      | 1   | 2 | 4 | 10 | 7 | 5  |    | 1    |
| Streptomycin        |                          |      | 1    |       | 3    | 2   | 8 | 8 | 3  | 3 | 2  |    |      |
| Kanamycin           |                          |      |      | 2     |      | 2   | 5 | 8 | 5  | 4 | 4  |    |      |
| Amikacin            |                          |      |      |       |      | 6   | 3 | 7 | 6  | 5 | 3  |    |      |
| Ethionamide         |                          |      |      |       |      |     | 2 | 5 | 13 | 8 | 2  |    |      |
| Levofloxacin        |                          |      | 1    | 5     | 1    | 5   | 7 | 5 | 5  | 1 |    |    |      |

**TABLE S3** Relationships between VNTR-based genotype and isolates from different hosts

| Cluster <sup>a</sup> | pulmonary MAH disease patients (n = 46) | HIV-positive patients (n = 30) | <i>P</i> value <sup>b</sup> |
|----------------------|-----------------------------------------|--------------------------------|-----------------------------|
| I                    | 3 (6.5%)                                | 11 (36.7%)                     | 0.0031                      |
| II                   | 19 (41.3%)                              | 11 (36.7%)                     |                             |
| III                  | 24 (52.2%)                              | 8 (26.7%)                      |                             |

  

| Cluster  | pulmonary MAH disease patients (n = 46) | HIV-positive patients (n = 30) | <i>P</i> value |
|----------|-----------------------------------------|--------------------------------|----------------|
| I        | 3 (6.5%)                                | 11 (36.7%)                     | 0.0017         |
| II + III | 43 (93.5%)                              | 19 (63.3%)                     |                |

<sup>a</sup> Each cluster was classified by the phylogenetic analysis as shown in FIG. 1.

<sup>b</sup> *P* values were calculated using Fisher's exact test.

**TABLE S4** Comparison of drug resistance and susceptibility in isolates within the three VNTR clusters

| Antimicrobial agent | Cluster <sup>a</sup> I (n = 14) |                    | Cluster II (n = 30) |           | Cluster III (n = 32) |           | <i>P</i> value <sup>b</sup> |                  |                   |                    |
|---------------------|---------------------------------|--------------------|---------------------|-----------|----------------------|-----------|-----------------------------|------------------|-------------------|--------------------|
|                     | R <sup>c</sup> (%)              | S <sup>c</sup> (%) | R (%)               | S (%)     | R (%)                | S (%)     | Clusters I vs II vs III     | Clusters I vs II | Clusters I vs III | Clusters II vs III |
| Clarithromycin      | 0 (0)                           | 14 (100)           | 2 (6.7)             | 28 (93.3) | 2 (6.2)              | 30 (93.8) | 1                           | 1                | 1                 | 1                  |
| Rifampicin          | 0                               | 14 (100)           | 0 (0)               | 30 (100)  | 1 (3.1)              | 31 (96.9) | 1                           | 1                | 1                 | 1                  |
| Ethambutol          | 7 (50.0)                        | 7 (50.0)           | 18 (60.0)           | 12 (40.0) | 27 (84.4)            | 5 (15.6)  | 0.030                       | 0.745            | 0.027             | 0.046              |
| Streptomycin        | 0                               | 14 (100)           | 7 (23.3)            | 23 (76.7) | 12 (37.5)            | 20 (62.5) | 0.019                       | 0.078            | 0.009             | 0.277              |
| Kanamycin           | 0                               | 14 (100)           | 7 (23.3)            | 23 (76.7) | 12 (37.5)            | 20 (62.5) | 0.019                       | 0.078            | 0.009             | 0.277              |
| Amikacin            | 0                               | 14 (100)           | 3 (10.0)            | 27 (90.0) | 7 (21.9)             | 25 (78.1) | 0.122                       | 0.540            | 0.083             | 0.304              |
| Ethionamide         | 2 (14.3)                        | 12 (85.7)          | 23 (76.7)           | 7 (23.3)  | 15 (46.9)            | 17 (53.1) | ≤0.001                      | ≤0.001           | 0.049             | 0.020              |
| Levofloxacin        | 0                               | 14 (100)           | 1 (3.3)             | 29 (96.7) | 0 (0)                | 32 (100)  | 0.579                       | 1                | 1                 | 0.484              |

<sup>a</sup> Each cluster was classified by the phylogenetic analysis as shown in FIG. 1.

<sup>b</sup> *P* values were calculated using Fisher's exact test.

<sup>c</sup> The breakpoints of the antimicrobial agents were determined according to the criteria described in the BrothMIC NTM manual and the Materials and Methods. R, resistant; S, susceptible.

**TABLE S5** Association between presence of *ISMav6* and drug resistance

| Antimicrobial agent | <i>ISMav6</i> positive<br>(n = 31) |                    | <i>ISMav6</i> negative<br>(n = 45) |           | <i>P</i> value <sup>a</sup>        |
|---------------------|------------------------------------|--------------------|------------------------------------|-----------|------------------------------------|
|                     | R <sup>b</sup> (%)                 | S <sup>b</sup> (%) | R (%)                              | S (%)     | <i>ISMav6</i> positive vs negative |
| Clarithromycin      | 4 (12.9)                           | 27 (87.1)          | 0 (0)                              | 45 (100)  | 0.025                              |
| Rifampicin          | 1 (3.2)                            | 30 (96.8)          | 0 (0)                              | 45 (100)  | 0.408                              |
| Ethambutol          | 24 (77.4)                          | 7 (22.6)           | 28 (62.2)                          | 17 (37.8) | 0.212                              |
| Streptomycin        | 12 (38.7)                          | 19 (61.3)          | 7 (15.6)                           | 38 (84.4) | 0.031                              |
| Kanamycin           | 13 (41.9)                          | 18 (58.1)          | 6 (13.3)                           | 39 (86.7) | 0.007                              |
| Amikacin            | 9 (29.0)                           | 22 (71.0)          | 1 (2.2)                            | 44 (97.8) | ≤0.001                             |
| Ethionamide         | 15 (48.4)                          | 16 (51.6)          | 25 (55.6)                          | 20 (44.4) | 0.642                              |
| Levofloxacin        | 0 (0)                              | 31 (100)           | 1 (2.2)                            | 44 (97.8) | 1                                  |

<sup>a</sup> *P* values were calculated using Fisher's exact test.

<sup>b</sup> The breakpoints of the antimicrobial agents were determined according to the criteria described in the BrothMIC NTM manual and the Materials and Methods. R, resistant; S, susceptible.

**TABLE S6** Relationships between presence of *ISMav6* and VNTR-based genotype

| Cluster <sup>a</sup> | <i>ISMav6</i> positive<br>(n = 31) | <i>ISMav6</i> negative<br>(n = 45) | <i>P</i> value <sup>b</sup> |
|----------------------|------------------------------------|------------------------------------|-----------------------------|
| I                    | 0 (0.0%)                           | 14 (31.1%)                         | ≤0.001                      |
| II                   | 9 (29.0%)                          | 21 (46.7%)                         |                             |
| III                  | 22 (71.0%)                         | 10 (22.2%)                         |                             |

<sup>a</sup> Each cluster was classified by the phylogenetic analysis as shown in FIG. 1.

<sup>b</sup> *P* values were calculated using Fisher's exact test.
